# Supplementary material for: Impaired neutrophil-mediated cell death drives Ewing’s Sarcoma in the background of Down syndrome
Source: Front Oncol. 2024 Oct 3;14:1429833. doi: 10.3389/fonc.2024.1429833 (PMC11484044; doi:10.3389/fonc.2024.1429833)
Supplement: Supplementary file 6 [file Table4.xlsx]

## Sheet: Supplementary Table 4
Supplementary Table 4. Significantly enriched positional gene set for genes undergoing CNVs
ID	CNV	GeneRatio	BgRatio	Rich Factor	pvalue	FDR	geneID
chr21q22	Amplification	172/2362	353/37999	0.487252	1.12419e-110	6.96999e-109	ABCG1/ADARB1/AGPAT3/AIRE/AP000688.1/B3GALT5/BACE2/BRWD1/C21orf58/C21orf62/C2CD2/CBR1/CBR3/CBS/CHAF1B/CLDN14/CLDN8/CLIC6/COL18A1/COL6A1/COL6A2/CRYAA/CRYZL1/CSTB/DIP2A/DNAJC28/DNMT3L/DONSON/DSCAM/DYRK1A/ERG/ETS2/EVA1C/FAM207A/FAM3B/FTCD/GART/HLCS/HMGN1/HSF2BP/HUNK/ICOSLG/IFNAR1/IFNAR2/IFNGR2/IGSF5/IL10RB/ITGB2/ITSN1/KCNE1/KCNE2/KCNJ15/KCNJ6/KRTAP10-1/KRTAP10-10/KRTAP10-11/KRTAP10-12/KRTAP10-2/KRTAP…
chr7q22	Amplification	132/2362	213/37999	0.619718	1.964e-103	6.0884e-102	ACHE/ACTL6B/AGFG2/ALKBH4/AP1S1/AP4M1/ARMC10/ARPC1A/ARPC1B/ATXN7L1/AZGP1/BAIAP2L1/BCAP29/BUD31/C7orf61/CBLL1/CCDC71L/CDHR3/CLDN15/CNPY4/COG5/COL26A1/COPS6/CPSF4/CUX1/CYP3A4/CYP3A43/CYP3A5/CYP3A7/CYP3A7-CYP3A51P/DNAJC2/DUS4L/EFCAB10/EPHB4/EPO/FAM185A/FAM200A/FBXL13/FBXO24/FIS1/GAL3ST4/GIGYF1/GJC3/GNB2/GPC2/GPR22/HBP1/IFT22/KMT2E/KPNA7/LAMTOR4/LHFPL3/LRCH4/LRRC17/LRWD1/MBLAC1/MCM7/MEPCE/MOGAT3/MOSPD…
chrXp22	Amplification	91/2362	233/37999	0.390558	1.39912e-48	2.89152e-47	ACE2/ACOT9/ADGRG2/AMELX/ANOS1/AP1S2/APOO/ARHGAP6/ASB11/ASB9/ATXN3L/BEND2/BMX/CA5B/CDKL5/CLCN4/CLDN34/CNKSR2/CTPS2/CXorf58/DDX53/EGFL6/EIF1AX/EIF2S3/FAM9A/FAM9B/FAM9C/FANCB/FRMPD4/GEMIN8/GLRA2/GPM6B/GPR143/GRPR/HCCS/KLHL15/KLHL34/MAGEB17/MAP3K15/MAP7D2/MBTPS2/MID1/MOSPD2/MSL3/NHS/OFD1/PCYT1B/PDHA1/PDK3/PHEX/PHKA2/PIGA/PIR/PNPLA4/POLA1/PPEF1/PRDX4/PRPS2/PTCHD1/PUDP/RAB9A/RAI2/RBBP7/REPS2/RPS6KA3/RS…
chr7q21	Amplification	75/2362	164/37999	0.457317	3.6355e-46	5.63503e-45	ABCB1/ABCB4/ADAM22/AKAP9/ANKIB1/ASB4/ASNS/BET1/BHLHA15/BRI3/CACNA2D1/CALCR/CASD1/CD36/CDK14/CDK6/CFAP69/CLDN12/COL1A2/CROT/CYP51A1/DBF4/DLX5/DLX6/DMTF1/DYNC1I1/ERVW-1/FAM133B/FZD1/GATAD1/GNAI1/GNAT3/GNG11/GNGT1/GRM3/GTPBP10/HEPACAM2/HGF/KRIT1/LMTK2/LRRD1/MAGI2/MTERF1/OCM2/PCLO/PDK4/PEG10/PEX1/PON1/PON2/PON3/PPP1R9A/RBM48/RUNDC3B/SAMD9/SAMD9L/SDHAF3/SEM1/SEMA3A/SEMA3C/SEMA3D/SEMA3E/SGCE/SLC25A13/S…
chr18q21	Amplification	80/2362	189/37999	0.42328	5.23198e-46	6.48765e-45	ACAA2/ALPK2/ATP8B1/BCL2/BOD1L2/C18orf25/C18orf32/C18orf54/CCBE1/CCDC68/CDH20/CFAP53/CPLX4/CTIF/CXXC1/DCC/DYM/DYNAP/ELAC1/ELOA2/EPG5/FECH/GRP/HAUS1/HDHD2/IER3IP1/KATNAL2/KDSR/LIPG/LMAN1/LOXHD1/MALT1/MAPK4/MBD1/MBD2/MC4R/ME2/MEX3C/MRO/MYO5B/NEDD4L/ONECUT2/PHLPP1/PIAS2/PIGN/PMAIP1/POLI/PSTPIP2/RAB27B/RAX/RNF152/RNF165/RPL17/RPL17-C18orf32/SEC11C/SERPINB10/SERPINB11/SERPINB12/SERPINB13/SERPINB2/SERPI…
chr8q22	Amplification	65/2362	153/37999	0.424837	9.6064e-38	9.92662e-37	ANKRD46/ATP6V1C1/AZIN1/BAALC/C8orf37/CCNE2/CDH17/COX6C/CPQ/CTHRC1/DCAF13/DCSTAMP/DPY19L4/DPYS/ERICH5/ESRP1/FBXO43/FSBP/FZD6/GDF6/GEM/GRHL2/INTS8/KCNS2/KLF10/LAPTM4B/LRP12/MATN2/MTDH/MTERF3/NCALD/NDUFAF6/NIPAL2/ODF1/OSR2/PABPC1/PDP1/PLEKHF2/POLR2K/POP1/PTDSS1/RAD54B/RBM12B/RBM12B-AS1/RGS22/RIDA/RIMS2/RNF19A/RPL30/RRM2B/SDC2/SLC25A32/SNX31/SPAG1/STK3/TMEM67/TP53INP1/TRIQK/TSPYL5/UBR5/UQCRB/VPS13B/Y…
chr4q31	Amplification	65/2362	157/37999	0.414013	6.5473e-37	5.79904e-36	ABCE1/ANAPC10/ARFIP1/ARHGAP10/C4orf51/CLGN/DCHS2/DCLK2/EDNRA/ELF2/ELMOD2/FAM160A1/FBXW7/FGA/FGB/FHDC1/FREM3/GAB1/GATB/GYPA/GYPB/GYPE/HHIP/IL15/INPP4B/LRBA/LSM6/MAB21L2/MAML3/MGARP/MGAT4D/MGST2/MMAA/MND1/NAA15/NDUFC1/NOCT/NR3C2/OTUD4/PLRG1/POU4F2/PRMT9/PRSS48/RAB33B/RNF150/RNF175/RPS3A/SCOC/SETD7/SFRP2/SH3D19/SLC10A7/SMAD1/SMARCA5/TBC1D9/TIGD4/TLR2/TMEM154/TMEM184C/TRIM2/TTC29/UCP1/USP38/ZNF330/ZN…
chr7q31	Amplification	59/2362	129/37999	0.457364	1.33081e-36	1.03138e-35	AASS/ANKRD7/ASB15/ASZ1/C7orf77/CADPS2/CAPZA2/CAV1/CAV2/CFTR/CPED1/CTTNBP2/DLD/DNAJB9/DOCK4/FAM3C/FEZF1/FOXP2/GPR37/GPR85/GRM8/HYAL4/IFRD1/IMMP2L/ING3/IQUB/KCND2/LAMB1/LAMB4/LMOD2/LRRN3/LSM8/LSMEM1/MDFIC/MET/NDUFA5/NRCAM/PNPLA8/POT1/PPP1R3A/PTPRZ1/RNF133/RNF148/SLC13A1/SLC26A3/SPAM1/ST7/TAS2R16/TES/TFEC/THAP5/TMEM168/TMEM229A/TSPAN12/WASL/WNT16/WNT2/ZNF277/ZNF800
chr6q22	Amplification	56/2362	119/37999	0.470588	1.20497e-35	8.30093e-35	ARHGAP18/ASF1A/C6orf58/CALHM4/CENPW/CEP85L/CLVS2/COL10A1/DCBLD1/DSE/ECHDC1/FABP7/FAM162B/FAM184A/FRK/GJA1/GOPC/GPRC6A/HDDC2/HEY2/HINT3/HS3ST5/HSF2/KIAA0408/KPNA5/LAMA2/MAN1A1/MCM9/NCOA7/NKAIN2/NT5DC1/NUS1/PKIB/PLN/PTPRK/RFX6/RNF146/RNF217/ROS1/RSPH4A/RSPO3/RWDD1/SERINC1/SLC35F1/SMPDL3A/SOGA3/TBC1D32/THEMIS/TMEM244/TPD52L1/TRAPPC3L/TRDN/TRMT11/TSPYL1/TSPYL4/VGLL2
chr8q21	Amplification	67/2362	178/37999	0.376404	6.33415e-35	3.92717e-34	ATP6V0D2/C8orf88/CA1/CA13/CA2/CA3/CALB1/CHMP4C/CNBD1/CNGB3/CPNE3/CRISPLD1/DCAF4L2/DECR1/E2F5/ELOC/FABP12/FABP4/FABP5/FABP9/GDAP1/HEY1/HNF4G/IL7/IMPA1/JPH1/KCNB2/LRRC69/LRRCC1/LY96/MMP16/MRPS28/NBN/NECAB1/OSGIN2/OTUD6B/PAG1/PEX2/PI15/PKIA/PMP2/PSKH2/RALYL/RDH10/RIPK2/RMDN1/RPL7/RUNX1T1/SBSPON/SLC10A5/SLC26A7/SLC7A13/SNX16/STAU2/STMN2/TERF1/TMEM64/TMEM70/TPD52/TRPA1/UBE2W/WWP1/ZBTB10/ZC2HC1A/ZFAND1…
chr7q11	Amplification	78/2362	253/37999	0.3083	2.0542e-33	1.15782e-32	ABHD11/ASL/AUTS2/BAZ1B/BCL7B/CALN1/CCDC146/CCL24/CCL26/CLDN3/CLDN4/CLIP2/CRCP/DNAJC30/DTX2/EIF4H/ELN/ERV3-1/FGL2/FKBP6/FZD9/GSAP/GTF2I/GTF2IRD1/GTF2IRD2/GTF2IRD2B/GUSB/HIP1/HSPB1/KCTD7/LAT2/LIMK1/MDH2/MLXIPL/NCF1/NSUN5/PHTF2/POM121/POM121C/POMZP3/POR/PTPN12/RABGEF1/RFC2/RHBDD2/RSBN1L/SBDS/SPDYE16/SPDYE5/SRRM3/SSC4D/STX1A/STYXL1/TBL2/TMEM120A/TMEM248/TMEM60/TPST1/TRIM50/TRIM73/TRIM74/TYW1/TYW1B/UP…
chrXp11	Amplification	93/2362	370/37999	0.251351	9.18757e-32	4.74691e-31	ARAF/ATP6AP2/BCOR/CACNA1F/CASK/CCDC120/CCDC22/CDK16/CFP/CHST7/CXorf38/DDX3X/DUSP21/DYNLT3/EBP/EFHC2/ELK1/ERAS/FOXP3/FTSJ1/FUNDC1/GAGE10/GAGE12J/GAGE13/GAGE2E/GATA1/GLOD5/GPKOW/GPR34/GPR82/GRIPAP1/HDAC6/JADE3/KCND1/KDM6A/KRBOX4/MAGIX/MAOA/MAOB/MED14/MID1IP1/MPC1L/NDP/NDUFB11/NYX/OTC/OTUD5/PCSK1N/PIM2/PLP2/PORCN/PPP1R3F/PQBP1/PRAF2/PRICKLE3/RBM10/RBM3/RGN/RP2/RPGR/SLC35A2/SLC38A5/SLC9A7/SPACA5/SPAC…
chr6q23	Amplification	49/2362	106/37999	0.462264	6.61436e-31	3.15454e-30	AHI1/AKAP7/ALDH8A1/ARFGEF3/ARG1/BCLAF1/CTAGE9/ENPP1/ENPP3/EPB41L2/EYA4/HBS1L/IFNGR1/IL20RA/IL22RA2/L3MBTL3/MAP3K5/MAP7/MED23/MOXD1/MTFR2/MYB/OLIG3/OR2A4/PBOV1/PDE7B/PERP/PEX7/RPS12/SAMD3/SGK1/SLC18B1/SLC2A12/SLC35D3/SMLR1/STX7/TAAR1/TAAR2/TAAR5/TAAR6/TAAR8/TAAR9/TBPL1/TCF21/TMEM200A/TNFAIP3/VNN1/VNN2/VNN3
chr7q32	Amplification	45/2362	90/37999	0.5	2.23363e-30	9.89177e-30	AHCYL2/ARF5/ATP6V1F/CALU/CCDC136/CEP41/COPG2/CPA1/CPA2/CPA4/CPA5/FAM71F1/FAM71F2/FLNC/FSCN3/GCC1/HILPDA/IMPDH1/IRF5/KCP/KLF14/KLHDC10/LEP/LRRC4/MEST/METTL2B/MKLN1/NRF1/OPN1SW/PAX4/PLXNA4/PODXL/PRRT4/RBM28/SMKR1/SMO/SND1/SSMEM1/STRIP2/TMEM209/TNPO3/TSGA13/TSPAN33/UBE2H/ZC3HC1
chr18p11	Amplification	64/2362	201/37999	0.318408	1.47439e-28	6.09416e-28	ADCYAP1/AFG3L2/ANKRD12/ANKRD30B/ANKRD62/APCDD1/ARHGAP28/CEP192/CEP76/CETN1/CHMP1B/CIDEA/CLUL1/COLEC12/DLGAP1/EMILIN2/ENOSF1/EPB41L3/FAM210A/GNAL/IMPA2/L3MBTL4/LAMA1/LDLRAD4/LPIN2/LRRC30/MC2R/MC5R/METTL4/MPPE1/MTCL1/MYL12A/MYL12B/MYOM1/NAPG/NDC80/NDUFV2/PIEZO2/POTEC/PPP4R1/PRELID3A/PSMG2/PTPN2/PTPRM/RAB12/RAB31/RALBP1/RNMT/SEH1L/SLC35G4/SMCHD1/SPIRE1/TGIF1/THOC1/TMEM200C/TUBB6/TWSG1/TXNDC2/TYMS/US…
chr6q25	Amplification	54/2362	154/37999	0.350649	1.20948e-26	4.68673e-26	AKAP12/ARID1B/ARMT1/CCDC170/CLDN20/CNKSR3/DYNLT1/ESR1/EZR/FBXO5/GINM1/GTF2H5/IPCEF1/IYD/KATNA1/LATS1/LRP11/MTHFD1L/MTRF1L/MYCT1/NOX3/NUP43/OPRM1/PCMT1/PLEKHG1/PPIL4/PPP1R14C/RAET1E/RAET1G/RAET1L/RGS17/RMND1/RSPH3/SCAF8/SERAC1/SNX9/SUMO4/SYNE1/SYNJ2/SYTL3/TAB2/TFB1M/TIAM2/TMEM181/TMEM242/TULP4/ULBP1/ULBP2/ULBP3/UST/VIP/ZBTB2/ZC3H12D/ZDHHC14
chr7p15	Amplification	43/2362	96/37999	0.447917	1.35414e-26	4.93864e-26	C7orf31/CBX3/CCDC126/CDCA7L/CREB5/CYCS/DNAH11/EVX1/FAM126A/FAM221A/GPNMB/HIBADH/HNRNPA2B1/HOXA1/HOXA10/HOXA11/HOXA13/HOXA2/HOXA3/HOXA4/HOXA5/HOXA6/HOXA7/HOXA9/IGF2BP3/IL6/JAZF1/KLHL7/MALSU1/MPP6/NFE2L3/NPVF/NPY/OSBPL3/RAPGEF5/SKAP2/SNX10/SP4/STEAP1B/STK31/TAX1BP1/TOMM7/TRA2A
chr6q21	Amplification	47/2362	117/37999	0.401709	2.20221e-26	7.5854e-26	AK9/AMD1/ARMC2/ATG5/BEND3/BVES/CD164/CDC40/CDK19/CEP57L1/DDO/FAM229B/FIG4/FOXO3/FYN/GPR6/GTF3C6/HDAC2/LAMA4/MARCKS/METTL24/MFSD4B/MICAL1/NR2E1/OSTM1/PDSS2/POPDC3/PPIL6/PRDM1/PREP/QRSL1/REV3L/RFPL4B/RPF2/RTN4IP1/SCML4/SEC63/SESN1/SLC16A10/SLC22A16/SMPD2/SNX3/SOBP/TRAF3IP2/TUBE1/WASF1/ZBTB24
chr7p14	Amplification	55/2362	163/37999	0.337423	3.73582e-26	1.21906e-25	ADCYAP1R1/AMPH/ANLN/AOAH/AQP1/AVL9/BBS9/BMPER/C7orf25/CDK13/CHN2/CPVL/CRHR2/DPY19L1/EEPD1/ELMO1/EPDR1/FKBP14/FKBP9/GGCT/GHRHR/GLI3/GPR141/HECW1/HERPUD2/INHBA/INMT/KBTBD2/KIAA0895/LSM5/MPLKIP/MRPL32/MTURN/NEUROD6/NME8/NOD1/NPSR1/NT5C3A/PDE1C/PLEKHA8/POU6F2/PPP1R17/PRR15/PSMA2/RALA/RP9/SCRN1/SFRP4/STARD3NL/SUGCT/TBX20/TRIL/VPS41/WIPF3/ZNRF2
chr7p13	Amplification	30/2362	50/37999	0.6	7.43278e-24	2.30416e-23	AEBP1/BLVRA/CAMK2B/CCM2/COA1/DBNL/DDX56/GCK/MRPS24/MYL7/MYO1G/NACAD/NPC1L1/NUDCD3/OGDH/PGAM2/POLD2/POLM/PPIA/PURB/RAMP3/SPDYE1/STK17A/TBRG4/TMED4/UBE2D4/URGCP/URGCP-MRPS24/YKT6/ZMIZ2
chr4p15	Amplification	45/2362	122/37999	0.368852	1.70649e-23	5.03822e-23	ADGRA3/ANAPC4/BOD1L1/BST1/C1QTNF7/CC2D2A/CCDC149/CCKAR/CD38/CLRN2/CPEB2/DCAF16/DHX15/FAM184B/FAM200B/FBXL5/FGFBP1/FGFBP2/HS3ST1/KCNIP4/LAP3/LCORL/LDB2/LGI2/MED28/NCAPG/NKX3-2/PACRGL/PCDH7/PI4K2B/PPARGC1A/PROM1/QDPR/RAB28/RBPJ/SEL1L3/SEPSECS/SLC34A2/SLIT2/SMIM20/SOD3/STIM2/TAPT1/TBC1D19/ZCCHC4
chr6q24	Amplification	34/2362	72/37999	0.472222	2.93321e-22	8.26632e-22	ABRACL/ADAT2/ADGB/ADGRG6/AIG1/CCDC28A/CITED2/ECT2L/EPM2A/FBXO30/FUCA2/GJE1/GRM1/HEBP2/HECA/HIVEP2/LTV1/NHSL1/NMBR/PEX3/PHACTR2/PLAGL1/RAB32/REPS1/SAMD5/SASH1/SF3B5/SHPRH/STX11/STXBP5/TXLNB/UTRN/VTA1/ZC2HC1B
chr4q22	Amplification	33/2362	70/37999	0.471429	1.28651e-21	3.46798e-21	ABCG2/ATOH1/BMPR1B/CCSER1/DMP1/DSPP/FAM13A/GPRIN3/GRID2/HERC3/HERC5/HERC6/HPGDS/HSD17B11/HSD17B13/IBSP/KLHL8/MEPE/MMRN1/NAP1L5/NUDT9/PDHA2/PDLIM5/PIGY/PKD2/PPM1K/PYURF/SMARCAD1/SNCA/SPARCL1/SPP1/TIGD2/UNC5C
chr4q35	Amplification	39/2362	105/37999	0.371429	1.10769e-20	2.86153e-20	ACSL1/ANKRD37/C4orf47/CASP3/CCDC110/CDKN2AIP/CENPU/CFAP97/CLDN22/CLDN24/CYP4V2/DCTD/DUX4/ENPP6/F11/FAM149A/FAT1/FRG1/FRG2/HELT/ING2/IRF2/KLKB1/LRP2BP/MTNR1A/PDLIM3/PRIMPOL/RWDD4/SLC25A4/SNX25/SORBS2/STOX2/TLR3/TRAPPC11/TRIML1/TRIML2/UFSP2/WWC2/ZFP42
chr4q12	Amplification	34/2362	79/37999	0.43038	1.21962e-20	3.02465e-20	AASDH/ARL9/CEP135/CHIC2/CLOCK/DCUN1D4/ERVMER34-1/EXOC1/FIP1L1/GSX2/HOPX/IGFBP7/KDR/KIT/LNX1/LRRC66/NMU/NOA1/PAICS/PDCL2/PDGFRA/POLR2B/PPAT/RASL11B/REST/SCFD2/SGCB/SPATA18/SPINK2/SRD5A3/SRP72/THEGL/TMEM165/USP46
chr8q24	Amplification	70/2362	321/37999	0.218069	1.83433e-20	4.37417e-20	AARD/ADCY8/AGO2/ANXA13/ASAP1/ATAD2/C8orf76/CHRAC1/COL14A1/COL22A1/COLEC10/DEPTOR/DERL1/DSCC1/EFR3A/EIF3H/ENPP2/EXT1/FAM135B/FAM83A/FAM91A1/FBXO32/FER1L6/GSDMC/HAS2/HHLA1/KCNK9/KCNQ3/KHDRBS3/KLHL38/LRRC6/MAL2/MED30/MRPL13/MTBP/MTSS1/MYC/NDRG1/NDUFB9/NSMCE2/OC90/PHF20L1/POU5F1B/PTK2/RAD21/RNF139/SAMD12/SLA/SLC30A8/SNTB1/SQLE/ST3GAL1/TAF2/TATDN1/TBC1D31/TG/TMEM65/TMEM71/TMEM75/TNFRSF11B/TRAPPC9/TRIB…
chr4q32	Amplification	40/2362	113/37999	0.353982	2.76574e-20	6.35097e-20	ANXA10/APELA/ASIC5/C4orf45/C4orf46/CBR4/CPE/CTSO/DDX60/DDX60L/ETFDH/FAM218A/FGG/FNIP2/FSTL5/GLRB/GRIA2/KLHL2/LRAT/MAP9/MSMO1/NAF1/NPY1R/NPY2R/NPY5R/PALLD/PDGFC/PPID/RAPGEF2/RBM46/RXFP1/SPOCK3/TDO2/TKTL2/TLL1/TMA16/TMEM144/TMEM192/TRIM60/TRIM61
chr6q14	Amplification	36/2362	93/37999	0.387097	6.63003e-20	1.46808e-19	BCKDHB/CEP162/CGA/COL12A1/COX7A2/CYB5R4/ELOVL4/FILIP1/HMGN3/HTR1B/HTR1E/IBTK/IMPG1/IRAK1BP1/LCA5/ME1/MEI4/MRAP2/MYO6/NT5E/PGM3/PHIP/PRSS35/RIPPLY2/RWDD2A/SENP6/SH3BGRL2/SNAP91/SNX14/SYNCRIP/TBX18/TMEM30A/TPBG/TTK/UBE3D/ZNF292
chr4p14	Amplification	29/2362	64/37999	0.453125	1.42592e-18	3.04851e-18	ARAP2/C4orf19/CHRNA9/DTHD1/FAM114A1/KLB/KLF3/KLHL5/LIAS/N4BP2/NSUN7/NWD2/PDS5A/PGM2/PTTG2/RBM47/RELL1/RFC1/RHOH/RPL9/SMIM14/TBC1D1/TLR1/TLR10/TLR6/TMEM156/UBE2K/UGDH/WDR19
chr8q13	Amplification	30/2362	71/37999	0.422535	4.18163e-18	8.64204e-18	ADHFE1/ARFGEF1/ARMC1/C8orf34/C8orf44/COPS5/CPA6/CRH/CSPP1/DNAJC5B/EYA1/LACTB2/MCMDC2/MSC/MTFR1/MYBL1/NCOA2/PDE7A/PPP1R42/PRDM14/PREX2/RRS1/SGK3/SLCO5A1/SULF1/TCF24/TRAM1/TRIM55/VCPIP1/XKR9
chr6q15	Amplification	25/2362	48/37999	0.520833	4.65298e-18	9.30597e-18	AKIRIN2/ANKRD6/BACH2/C6orf163/CASP8AP2/CFAP206/CNR1/GABRR1/GABRR2/GJA10/GJB7/LYRM2/MAP3K7/MDN1/ORC3/PM20D2/PNRC1/RARS2/RNGTT/RRAGD/SLC35A1/SMIM8/SPACA1/SRSF12/UBE2J1
chr6q16	Amplification	24/2362	52/37999	0.461538	7.69502e-16	1.44573e-15	ASCC3/CCNC/COQ3/EPHA7/FAXC/FBXL4/FHL5/FUT9/GPR63/GRIK2/HACE1/KLHL32/LIN28B/MANEA/MCHR2/MMS22L/NDUFAF4/PNISR/POU3F2/PRDM13/SIM1/TSTD3/UFL1/USP45
chr7q33	Amplification	24/2362	52/37999	0.461538	7.69502e-16	1.44573e-15	AGBL3/AKR1B1/AKR1B10/AKR1B15/AKR1D1/BPGM/CALD1/CHCHD3/CHRM2/CNOT4/CREB3L2/DGKI/EXOC4/FAM180A/LRGUK/MTPN/NUP205/PTN/SLC13A4/SLC35B4/STRA8/TMEM140/TRIM24/WDR91
chr4q24	Amplification	24/2362	56/37999	0.428571	6.16355e-15	1.12394e-14	AIMP1/ARHGEF38/BANK1/BDH2/CENPE/CISD2/CXXC4/DDIT4L/EMCN/GIMD1/GSTCD/INTS12/MANBA/NFKB1/NPNT/PPA2/PPP3CA/SLC39A8/SLC9B1/SLC9B2/TACR3/TBCK/TET2/UBE2D3
chr7p21	Amplification	28/2362	83/37999	0.337349	5.03374e-14	8.9169e-14	ABCB5/AGMO/AGR2/AGR3/AHR/ANKMY2/ARL4A/BZW2/DGKB/ETV1/FERD3L/HDAC9/ITGB8/LRRC72/MACC1/MEOX2/PHF14/PRPS1L1/SCIN/SNX13/SOSTDC1/SP8/THSD7A/TMEM106B/TMEM196/TSPAN13/TWIST1/VWDE
chr1q42	Amplification	48/2362	230/37999	0.208696	1.00501e-13	1.73085e-13	ABCB10/ACTA1/AGT/ARID4B/ARV1/B3GALNT2/C1orf131/C1orf198/CAPN9/CCSAP/COA6/COG2/DISC1/EDARADD/EGLN1/ERO1B/EXOC8/FAM89A/GALNT2/GGPS1/GNG4/GNPAT/GPR137B/IRF2BP2/KCNK1/LYST/MAP10/NID1/NTPCR/NUP133/PCNX2/PGBD5/RAB4A/RBM34/RHOU/SIPA1L2/SLC35F3/SPRTN/TAF5L/TARBP1/TBCE/TMEM78/TOMM20/TRIM67/TSNAX/TSNAX-DISC1/TTC13/URB2
chr4q25	Amplification	28/2362	87/37999	0.321839	1.92905e-13	3.23247e-13	ALPK1/ANK2/AP1AR/CASP6/CFI/COL25A1/CYP2U1/DKK2/EGF/ELOVL6/ENPEP/ETNPPL/GAR1/HADH/LARP7/LEF1/LRIT3/NEUROG2/OSTC/PAPSS1/PITX2/PLA2G12A/RPL34/RRH/SEC24B/SGMS2/TIFA/ZGRF1
chrXp21	Amplification	27/2362	82/37999	0.329268	2.77145e-13	4.52184e-13	ARX/CFAP47/CYBB/DCAF8L1/DCAF8L2/DMD/FAM47A/FAM47B/FAM47C/FTHL17/GK/IL1RAPL1/LANCL3/MAGEB1/MAGEB10/MAGEB16/MAGEB18/MAGEB2/MAGEB3/MAGEB4/MAGEB5/MAGEB6/NR0B1/PRRG1/TAB3/TMEM47/XK
chr1q43	Amplification	23/2362	60/37999	0.383333	3.97988e-13	6.32698e-13	ACTN2/BECN2/CEP170/CHML/CHRM3/EXO1/FH/FMN2/GREM2/HEATR1/KMO/LGALS8/MAP1LC3C/MT1HL1/MTR/MTRNR2L11/OPN3/PLD5/RGS7/RYR2/SDCCAG8/WDR64/ZP4
chr4p12	Amplification	15/2362	24/37999	0.625	5.85982e-13	9.08273e-13	ATP10D/CNGA1/COMMD8/CORIN/COX7B2/GABRA2/GABRA4/GABRB1/GABRG1/GNPDA2/GUF1/NFXL1/NIPAL1/TXK/YIPF7
chr8q12	Amplification	27/2362	88/37999	0.306818	1.87714e-12	2.83861e-12	ASPH/BHLHE22/CA8/CHCHD7/CHD7/CLVS1/CYP7A1/CYP7B1/FAM110B/GGH/LYN/MOS/NKAIN3/NSMAF/PENK/PLAG1/RAB2A/RPS20/SDCBP/SDR16C5/TGS1/TMEM68/TOX/TTPA/UBXN2B/XKR4/YTHDF3
chr18q22	Amplification	22/2362	61/37999	0.360656	5.43904e-12	8.02906e-12	C18orf63/CBLN2/CCDC102B/CD226/CDH19/CDH7/CNDP1/CNDP2/CYB5A/DOK6/DSEL/FBXO15/HMSD/NETO1/RTTN/SERPINB8/SOCS6/TIMM21/TMX3/TSHZ1/ZADH2/ZNF407
chr4q27	Amplification	15/2362	29/37999	0.517241	2.58122e-11	3.72175e-11	ADAD1/ANXA5/BBS12/BBS7/CCNA2/EXOSC9/IL2/IL21/KIAA1109/MAD2L1/NDNF/PRDM5/QRFPR/TNIP3/TRPC3
chr6q13	Amplification	20/2362	56/37999	0.357143	6.14293e-11	8.65595e-11	B3GAT2/CD109/COL19A1/COL9A1/DDX43/DPPA5/EEF1A1/FAM135A/KCNQ5/KHDC1/KHDC1L/KHDC3L/LMBRD1/MTO1/OGFRL1/OOEP/RIMS1/SDHAF4/SLC17A5/SMAP1
chr8q11	Amplification	21/2362	70/37999	0.3	8.44331e-10	1.1633e-09	ATP6V1H/CEBPD/EFCAB1/LYPLA1/MCM4/MRPL15/NPBWR1/OPRK1/PCMTD1/PRKDC/PXDNL/RB1CC1/RGS20/RP1/SNAI2/SNTG1/SOX17/SPIDR/ST18/TCEA1/UBE2V2
chr8q23	Amplification	16/2362	44/37999	0.363636	3.70677e-09	4.99608e-09	ABRA/ANGPT1/CSMD3/EBAG9/EIF3E/EMC2/ENY2/KCNV1/NUDCD1/OXR1/PKHD1L1/RSPO2/SYBU/TMEM74/TRHR/TRPS1
chr7p12	Amplification	18/2362	58/37999	0.310345	7.35666e-09	9.70454e-09	ABCA13/ADCY1/C7orf57/COBL/DDC/FIGNL1/GRB10/HUS1/IGFBP1/IGFBP3/IKZF1/PKD1L1/POM121L12/SUN3/TNS3/UPP1/VWC2/ZPBP
chr18q23	Amplification	14/2362	39/37999	0.358974	4.25432e-08	5.49516e-08	ADNP2/ATP9B/CTDP1/GALR1/HSBP1L1/KCNG2/MBP/NFATC1/RBFA/SALL3/SMIM21/TXNL4A/ZNF236/ZNF516
chr4q26	Amplification	16/2362	53/37999	0.301887	7.73169e-08	9.78296e-08	ARSJ/C4orf3/CAMK2D/FABP2/METTL14/MTRNR2L13/MYOZ2/NDST3/NDST4/PDE5A/PRSS12/SEC24D/SYNPO2/TRAM1L1/UGT8/USP53
chr4p13	Amplification	2362-12-01	31/37999	0.387097	1.50201e-07	1.86249e-07	APBB2/ATP8A1/BEND4/DCAF4L1/GRXCR1/KCTD8/LIMCH1/PHOX2B/SHISA3/SLC30A9/TMEM33/UCHL1
chr21q21	Amplification	24/2362	119/37999	0.201681	2.71328e-07	3.29849e-07	ADAMTS1/ADAMTS5/APP/BACH1/BTG3/C21orf91/CCT8/CHODL/CLDN17/CXADR/CYYR1/GABPA/GRIK1/JAM2/LTN1/MAP3K7CL/MRPL39/N6AMT1/NCAM2/NRIP1/RWDD2B/TMPRSS15/USP16/USP25
chr4p11	Amplification	2362-08-01	19/37999	0.421053	8.95397e-06	1.06759e-05	CWH43/FRYL/OCIAD1/OCIAD2/SLAIN2/SLC10A4/TEC/ZAR1
chr7q34	Amplification	26/2362	180/37999	0.144444	5.3169e-05	6.21977e-05	ADCK2/AGK/ATP6V0A4/BRAF/CLEC2L/DENND2A/HIPK2/KDM7A/KIAA1549/KLRG2/LUC7L2/MKRN1/MRPS33/NDUFB2/PARP12/RAB19/SLC37A3/SVOPL/TBXAS1/TMEM178B/TMEM213/TTC26/UBN2/WEE2/ZC3HAV1/ZC3HAV1L
chr7p11	Amplification	15/2362	82/37999	0.182927	0.000145137	0.000166639	CCT6A/CHCHD2/EGFR/LANCL2/MRPS17/NUPR2/PHKG1/PSPH/SEC61G/SUMF2/VOPP1/VSTM2A/ZNF479/ZNF713/ZNF716
chr4q33	Amplification	2362-05-01	14/37999	0.357143	0.00115118	0.0012977	AADAT/CLCN3/MFAP3L/NEK1/SH3RF1
chr6q12	Amplification	2362-06-01	21/37999	0.285714	0.00138115	0.00152913	ADGRB3/EYS/FKBP1C/LGSN/PHF3/PTP4A1
chr3p21	Deletion	191/1994	304/37999	0.628289	1.0944e-165	2.18879e-164	ABHD14A/ABHD14A-ACY1/ABHD14B/ABHD5/ACTR8/ACY1/ALAS1/ALS2CL/AMIGO3/AMT/ANO10/APEH/ARIH2/ARIH2OS/ATRIP/BAP1/BSN/C3orf18/C3orf62/C3orf84/CACNA1D/CACNA2D2/CACNA2D3/CAMKV/CAMP/CCDC12/CCDC51/CCDC71/CCR1/CCR2/CCR3/CCR5/CCR9/CCRL2/CDC25A/CDCP1/CDHR4/CELSR3/CHDH/CISH/CLEC3B/COL7A1/CSPG5/CXCR6/CYB561D2/DAG1/DALRD3/DCP1A/DHX30/DNAH1/DOCK3/DUSP7/ELP6/EXOSC7/FBXW12/FYCO1/GLT8D1/GLYCTK/GMPPB/GNAI2/GNAT1/GNL3/G…
chr3p25	Deletion	79/1994	145/37999	0.544828	9.60492e-62	9.60492e-61	ANKRD28/ARPC4/ARPC4-TTLL3/ATG7/ATP2B2/BRK1/BRPF1/BTD/C3orf20/CAMK1/CAND2/CAPN7/CAV3/CCDC174/CHCHD4/CIDEC/COLQ/CPNE9/CRELD1/DPH3/EAF1/EMC3/FANCD2/FANCD2OS/FBLN2/FGD5/GALNT15/GHRL/GRIP2/HACL1/HDAC11/HRH1/IL17RC/IL17RE/IQSEC1/IRAK2/JAGN1/LHFPL4/LMCD1/LSM3/METTL6/MKRN2/MKRN2OS/MRPS25/MTMR14/NR2C2/NUP210/OGG1/OXNAD1/OXTR/PPARG/PRRT3/RAD18/RAF1/RBSN/RPL32/RPUSD3/SEC13/SETD5/SH3BP5/SLC6A1/SLC6A11/SLC6A6…
chr3p22	Deletion	78/1994	165/37999	0.472727	8.9013e-55	5.9342e-54	ACAA1/ACKR2/ACVR2B/ARPP21/CCDC13/CCK/CCR4/CCR8/CLASP2/CMTM6/CMTM7/CMTM8/CNOT10/CRTAP/CSRNP1/CTDSPL/CTNNB1/CX3CR1/CYP8B1/DCLK3/DLEC1/DYNC1LI1/EIF1B/ENTPD3/EPM2AIP1/EXOG/FBXL2/GLB1/GOLGA4/GORASP1/GPD1L/HHATL/HIGD1A/ITGA9/KLHL40/KRBOX1/LRRFIP2/LYZL4/MLH1/MOBP/MYD88/MYRIP/NKTR/OSBPL10/OXSR1/PDCD6IP/PLCD1/POMGNT2/RPL14/RPSA/SCN10A/SCN11A/SCN5A/SEC22C/SLC22A13/SLC22A14/SLC25A38/SNRK/SS18L2/STAC/SUSD5/T…
chr3p14	Deletion	49/1994	122/37999	0.401639	9.10056e-31	4.55028e-30	ABHD6/ACOX2/ADAMTS9/APPL1/ARF4/ARHGEF3/ARL6IP5/ASB14/ATXN7/C3orf14/C3orf49/CADPS/CCDC66/DENND6A/DNAH12/DNASE1L3/EOGT/ERC2/FAM107A/FAM3D/FEZF2/FHIT/FLNB/FRMD4B/HESX1/IL17RD/KBTBD8/KCTD6/LMOD3/LRIG1/LRTM1/MAGI1/PDE12/PDHB/PRICKLE2/PSMD6/PTPRG/PXK/RPP14/SLC25A26/SLMAP/SNTN/SPATA12/SUCLG2/SYNPR/THOC7/TMF1/UBA3/WNT5A
chr10q11	Deletion	59/1994	184/37999	0.320652	1.8056e-30	7.22241e-30	A1CF/AGAP4/AGAP6/AGAP9/ALOX5/ANTXRL/ANXA8/ANXA8L1/ARHGAP22/ASAH2/ASAH2B/BMS1/C10orf53/C10orf71/CHAT/CSGALNACT2/CXCL12/DRGX/ERCC6/FAM170B/FAM25C/FAM25G/FRMPD2/FXYD4/GDF10/GDF2/GPRIN2/HNRNPF/LRRC18/MAPK8/MSMB/NCOA4/NPY4R/OGDHL/OR13A1/PARG/PRKG1/RASGEF1A/RASSF4/RBP3/RET/SGMS1/SLC18A3/SYT15/TIMM23/TIMM23B/TMEM72/VSTM4/WASHC2A/WASHC2C/WDFY4/ZFAND4/ZNF22/ZNF239/ZNF32/ZNF33B/ZNF485/ZNF487/ZNF488
chr3p24	Deletion	31/1994	99/37999	0.313131	2.32638e-16	7.75461e-16	AZI2/CMC1/DAZL/EFHB/EOMES/KAT2B/KCNH8/LRRC3B/NEK10/NGLY1/NKIRAS1/NR1D2/OXSM/PLCL2/PP2D1/RAB5A/RARB/RBMS3/RFTN1/RPL15/SATB1/SGO1/SLC4A7/TBC1D5/TGFBR2/THRB/TOP2B/UBE2E1/UBE2E2/ZCWPW2/ZNF385D
chr19p12	Deletion	31/1994	111/37999	0.279279	8.23225e-15	2.35207e-14	ZNF100/ZNF208/ZNF254/ZNF257/ZNF429/ZNF43/ZNF430/ZNF431/ZNF486/ZNF492/ZNF493/ZNF626/ZNF66/ZNF675/ZNF676/ZNF681/ZNF682/ZNF708/ZNF714/ZNF726/ZNF728/ZNF729/ZNF730/ZNF737/ZNF738/ZNF85/ZNF90/ZNF91/ZNF93/ZNF98/ZNF99
chr3p26	Deletion	13/1994	44/37999	0.295455	2.47099e-07	6.17747e-07	ARL8B/BHLHE40/CNTN4/CNTN6/CRBN/EDEM1/GRM7/IL5RA/ITPR1/LRRN1/SETMAR/SUMF1/TRNT1
chr3p13	Deletion	1994-11-01	40/37999	0.275	4.54574e-06	1.01016e-05	EBLN2/EIF4E3/FOXP1/GPR27/GXYLT2/MITF/PDZRN3/PPP4R2/PROK2/RYBP/SHQ1
chr15q13	Deletion	16/1994	87/37999	0.183908	1.06728e-05	2.13455e-05	APBA2/ARHGAP11B/CHRFAM7A/FAM189A1/GOLGA8F/GOLGA8G/GOLGA8H/GOLGA8J/GOLGA8M/GOLGA8Q/GOLGA8R/GOLGA8T/HERC2/NSMCE3/OCA2/TJP1
chr3p11	Deletion	1994-07-01	24/37999	0.291667	0.000170168	0.000309396	C3orf38/CGGBP1/CHMP2B/EPHA3/HTR1F/POU1F1/ZNF654
chrYq11	Deletion	32/1994	309/37999	0.10356	0.000210913	0.000351522	BPY2/BPY2B/BPY2C/CDY1/CDY1B/CDY2A/CDY2B/DAZ1/DAZ2/DAZ3/DAZ4/DDX3Y/EIF1AY/HSFY1/HSFY2/KDM5D/NLGN4Y/PRORY/PRY/PRY2/RBMY1A1/RBMY1B/RBMY1D/RBMY1E/RBMY1F/RBMY1J/RPS4Y2/TMSB4Y/USP9Y/UTY/VCY/VCY1B
chr11q12	Deletion	33/1994	333/37999	0.0990991	0.000378558	0.000582397	OR10AG1/OR5AP2/OR5AR1/OR5AS1/OR5D16/OR5D18/OR5F1/OR5I1/OR5J2/OR5L1/OR5L2/OR5M1/OR5M10/OR5M11/OR5M3/OR5M8/OR5M9/OR5T1/OR5T2/OR5T3/OR5W2/OR8H1/OR8H2/OR8H3/OR8I2/OR8J1/OR8J3/OR8K1/OR8K3/OR8K5/OR8U1/OR9G1/TRIM51
chr15q11	Deletion	21/1994	208/37999	0.100962	0.00323567	0.00462239	CYFIP1/GOLGA6L1/GOLGA6L2/GOLGA6L22/GOLGA6L6/GOLGA8S/MAGEL2/MKRN3/NDN/NIPA1/NIPA2/NPAP1/OR4M2/OR4N4/POTEB/POTEB2/POTEB3/SNRPN/SNURF/TUBGCP5/UBE3A
chr15q12	Deletion	1994-04-01	15/37999	0.266667	0.00647378	0.0086317	ATP10A/GABRA5/GABRB3/GABRG3
chr3p23	Deletion	1994-03-01	10/37999	0.3	0.0131087	0.0163859	GADL1/STT3B/ZNF860
chr3p12	Deletion	1994-08-01	66/37999	0.121212	0.0218004	0.0256475	CADM2/CNTN3/FRG2C/GBE1/ROBO1/ROBO2/VGLL3/ZNF717
